1 **CLASSIFICATION**

2 BIOLOGICAL SCIENCES: Population Biology

3 **TITLE (112; 135 CHARACTERS MAX.)**

4 Ancient genomes from North Africa evidence prehistoric migrations to the Maghreb from  
5 both the Levant and Europe

6 **SHORT TITLE (48; 50 CHARACTERS MAX.)**

7 Paleogenomics of Moroccan Neolithic populations

8 **AUTHORS**

9 Rosa Fregel<sup>a\*</sup>, Fernando L. Méndez<sup>a</sup>, Youssef Bokbot<sup>b</sup>, Dimas Martín-Socas<sup>c</sup>, María D.  
10 Camalich-Massieu<sup>c</sup>, Jonathan Santana<sup>d</sup>, Jacob Morales<sup>e</sup>, María C. Ávila-Arcos<sup>a,f</sup>, Peter A.  
11 Underhill<sup>a</sup>, Beth Shapiro<sup>g</sup>, Genevieve Wojcik<sup>a</sup>, Morten Rasmussen<sup>a</sup>, Andre E. R. Soares<sup>g,s</sup>,  
12 Joshua Kapp<sup>g</sup>, Alexandra Sockell<sup>a</sup>, Francisco J. Rodríguez-Santos<sup>h</sup>, Abdeslam Mikdad<sup>b</sup>,  
13 Aioze Trujillo-Mederos<sup>c</sup> & Carlos D. Bustamante<sup>a,i</sup>

14 **AFFILIATIONS**

15 <sup>a</sup>Department of Genetics, School of Medicine, Stanford University, 365 Lasuen Street, CA  
16 94305, Stanford, US.

17 <sup>b</sup>Institut National des Sciences de l'Archéologie et du Patrimoine, Avenue Allal el Fassi,  
18 6828, Rabat, Morocco.

19 <sup>c</sup>Departamento de Prehistoria, Universidad de La Laguna, Calle Prof. Jose Luis Moreno  
20 Becerra, 38320, San Cristóbal de La Laguna, Spain.

21 <sup>d</sup>Department of Archaeology, Durham University, South Rd, Durham DH1 3LE, United  
22 Kingdom.

23 <sup>e</sup>Departamento de Ciencias Históricas, Universidad de Las Palmas de Gran Canaria, Pérez  
24 del Toro 1, 35003, Las Palmas de Gran Canaria, Spain.

25 <sup>f</sup>International Laboratory for Human Genome Research, National Autonomous University of  
26 Mexico, Blvd. Juriquilla 3001, 76230, Querétaro, Mexico.

27 <sup>g</sup>Department of Ecology and Evolutionary Biology, University of California, 1156 High  
28 Street, CA 95064, Santa Cruz, US.

29 <sup>h</sup>Instituto Internacional de Investigaciones Prehistóricas de Cantabria, Avda. de los Castros,  
30 39005, Cantabria, Spain.

31

## 32 **CORRESPONDING AUTHOR**

33 Rosa Fregel

34 Departamento de Genética

35 Universidad de La Laguna

36 Avda. Astrofísico Fco. Sánchez, SN

37 San Cristóbal de La Laguna 38206

38 Spain

39 [rfregel@ull.edu.es](mailto:rfregel@ull.edu.es)

40

## 41 **KEYWORDS**

42 ancient DNA; paleogenomics; Neolithic; North Africa

43

44 **ABSTRACT (249; 250 WORDS MAX.)**

45 The extent to which prehistoric migrations of farmers influenced the genetic pool of western  
46 North Africans remains unclear. Archaeological evidence suggests the Neolithization process  
47 may have happened through the adoption of innovations by local Epipaleolithic  
48 communities, or by demic diffusion from the Eastern Mediterranean shores or Iberia. Here,  
49 we present the first analysis of individuals' genome sequences from early and late Neolithic  
50 sites in Morocco, as well as Early Neolithic individuals from southern Iberia. We show that  
51 Early Neolithic Moroccans are distinct from any other reported ancient individuals and  
52 possess an endemic element retained in present-day Maghrebi populations, confirming a  
53 long-term genetic continuity in the region. Among ancient populations, Early Neolithic  
54 Moroccans are distantly related to Levantine Natufian hunter-gatherers (~9,000 BCE) and  
55 Pre-Pottery Neolithic farmers (~6,500 BCE). Although an expansion in Early Neolithic times  
56 is also plausible, the high divergence observed in Early Neolithic Moroccans suggests a  
57 long-term isolation and an early arrival in North Africa for this population. This scenario is  
58 consistent with early Neolithic traditions in North Africa deriving from Epipaleolithic  
59 communities who adopted certain innovations from neighbouring populations. Late Neolithic  
60 (~3,000 BCE) Moroccans, in contrast, share an Iberian component, supporting theories of  
61 trans-Gibraltar gene flow. Finally, the southern Iberian Early Neolithic samples share the  
62 same genetic composition as the Cardial Mediterranean Neolithic culture that reached Iberia  
63 ~5,500 BCE. The cultural and genetic similarities of the Iberian Neolithic cultures with that  
64 of North African Neolithic sites further reinforce the model of an Iberian migration into the  
65 Maghreb.

66

67 **SIGNIFICANCE STATEMENT (119; 120 WORDS MAX.)**

68 The acquisition of agricultural techniques during the so-called Neolithic revolution has been  
69 one of the major steps forward in human history. Using next-generation sequencing and  
70 ancient DNA techniques, we directly test if Neolithization in North Africa occurred through  
71 the transmission of ideas or by demic diffusion. We show that Early Neolithic Moroccans are

72 composed of an endemic Maghrebi element still retained in present-day North African  
73 populations and distantly related to Epipaleolithic communities from the Levant. However,  
74 late Neolithic individuals from North Africa are admixed, with a North African and a  
75 European component. Our results support the idea that the Neolithization of North Africa  
76 might have involved both the development of Epipaleolithic communities and the migration  
77 of people from Europe.

78

## 79 INTRODUCTION

80 One of the greatest transitions in human history was the transition from hunter-gatherer to  
81 farming lifestyle. How farming traditions expanded from their birthplace in the Fertile  
82 Crescent has been a matter of contention. Two models were proposed: one involving the  
83 movement of people and the other based on the transmission of ideas. Over the last decade,  
84 paleogenomics has been instrumental in settling long-disputed archaeological questions<sup>1</sup>,  
85 including those surrounding the Neolithic revolution<sup>2</sup>. Compared to the extensive genetic  
86 work done on Europe and the Near East, the Neolithic transition in North Africa, including  
87 the Maghreb, remains largely uncharacterized. Archaeological evidence suggests that some  
88 of the major innovations associated with the Neolithic, such as farming and pottery  
89 production, could have been introduced into northern Morocco through sea voyaging by  
90 people from Iberia or the central Mediterranean as early as *ca.* 5400 BCE<sup>3,4</sup>. In fact, some of  
91 the Neolithic pottery recorded in North Africa strongly resembles that of European cultures  
92 like the Cardial Early Neolithic, the Mediterranean early farmer culture located in Iberia<sup>5</sup>.  
93 However, other innovations such as some pottery traditions and bone and lithic technical  
94 customs could be the result of *in situ* development from Epipaleolithic communities,  
95 indicating a strong continuity in the local population since the Late Pleistocene<sup>6-10</sup>.

96 Genetic data from present-day populations<sup>11-13</sup> suggests that North African ancestry has  
97 contributions from four main sources: 1) an autochthonous Maghrebi component related to a  
98 back migration to Africa ~12,000 years ago from Eurasia; 2) a Middle Eastern component  
99 probably associated with the Arab conquest; 3) a sub-Saharan component derived from trans-  
100 Saharan migrations; and 4) a European component that has been linked to recent historic  
101 movements. Paleogenomic studies have begun to provide insights into North African  
102 Prehistory<sup>14-16</sup>; however, no research to date has tested whether the Neolithic transition in the  
103 Maghreb was driven by local populations who adopted cultural and technological  
104 innovations or the migration of people. Here, we perform genome-wide analysis of remains  
105 from the Early Neolithic site of Ifri n'Amr or Moussa (IAM; ~5,200 BCE, n=7) and the Late  
106 Neolithic site of Kelif el Boroud (KEB; ~3,000 BCE; n=8) (Supplementary Note 1). To test  
107 possible migrations through the Strait of Gibraltar, we also analyse human remains from the

108 southern Iberian Early Neolithic site of El Toro (TOR; ~5,000 BCE; n=12) (Figure 1). This  
109 Iberian Early Neolithic culture bears similarities with early Maghrebi pottery decoration, as  
110 well as bone and lithic tool production traditions which suggest an African influence<sup>17</sup>  
111 (Supplementary Note 1). Including these southern Iberian samples in our analysis enables a  
112 direct test of this hypothesis.

113 [Figure 1 here]

## 114 **RESULTS AND DISCUSSION**

115 We sequenced 38 Illumina pair-end libraries from 27 individuals, and selected the best-  
116 conserved libraries for subsequent analyses. Endogenous DNA content was generally low  
117 (2.88% on average) (Supplementary Note 2). Depth of coverage was consistently improved  
118 when enriching using baits targeting specific sites for the Multiethnic Genotyping Array  
119 (MEGA) (~100X), compared to whole-genome capture (~15X) (Supplementary Note 2).  
120 Following enrichment, we generated thirteen low-coverage genomes (five from IAM, four  
121 from KEB and four from TOR), with MEGA coverage ranging from 0.04X to 1.72X depth,  
122 and genome-wide coverage ranging from 0.01X to 0.74X depth (Table 1). All samples  
123 considered in this study met the standard aDNA authentication criteria, including observation  
124 of DNA fragmentation (~46 bp average read length) and damage patterns due to cytosine  
125 deamination toward the 5' ends of molecules (Supplementary Note 3).

126 Mitochondrial DNA and Y-chromosome haplogroups obtained for IAM (Moroccan Early  
127 Neolithic) and KEB (Moroccan Late Neolithic) suggest either a population replacement or an  
128 important genetic influx into Morocco between 5,000–3,000 BCE. IAM samples belong to  
129 the mtDNA haplogroups U6a and M1—both of which are associated with the back migration  
130 to Africa from Eurasia in Upper Palaeolithic times<sup>18,19</sup>—while KEB samples belong to  
131 haplogroups K1, T2 and X2, prominently found in Anatolian and European Neolithic  
132 samples<sup>2,20</sup> (Supplementary Note 4). Regarding the paternal lineages, IAM individuals carry  
133 Y chromosomes distantly related to the typically North African E-M81 haplogroup, while

134 the Y chromosome from KEB belongs to the T-M184 haplogroup; though scarce and broadly  
135 distributed today, this haplogroup has also been observed in European Neolithic individuals<sup>16</sup>  
136 (Supplementary Note 5). Both mtDNA and Y-chromosome lineages (K1, J2 and T2  
137 haplogroups, and G-M201 haplogroup, respectively) for samples from TOR (Iberian Early  
138 Neolithic) are similar to those observed in Europe during Neolithic times<sup>20</sup>.

139 [Table 1 here]

140 When projected on a Principal Components Analysis (PCA) space built using sub-Saharan  
141 African, North African, European and Middle Eastern population of the Human Genome  
142 Diversity Project (HGDP) dataset genotyped with MEGA, IAM samples are placed close to  
143 Mozabites, while Iberian Neolithic samples fall close to southern European populations  
144 (Supplementary Note 6). As suspected from the mtDNA and Y-chromosome data, KEB  
145 samples do not cluster with IAM and are placed in an intermediate position between IAM  
146 and TOR. We further explored the genetic structure of these samples using the program  
147 ADMIXTURE<sup>21</sup> (Figure 2). At K=5, we observe sub-Saharan African (red), early European  
148 Neolithic (green), North African (yellow), Middle Eastern (violet) and eastern European  
149 components (orange). Congruently with PCA results, TOR is composed of the early  
150 European component, clustering with Sardinian samples, and IAM is composed of the North  
151 African component, clustering with Mozabites. Finally, KEB is placed in an intermediate  
152 position, with ~50% of both early European Neolithic and North African ancestries. It is  
153 worth mentioning that, compared to current North African samples, IAM and KEB do not  
154 show any sub-Saharan African ancestry, suggesting that trans-Saharan migrations occurred  
155 after Neolithic times. This is in agreement with the analysis of present-day genome-wide  
156 data from Morocco, which estimated a migration of western African origin into Morocco  
157 only ~1,200 years ago<sup>11</sup>.

158 West Eurasian populations can be modelled as admixture of four different ancestral  
159 components<sup>2</sup>: Eastern and Western European hunter-gatherers, and Iranian and Levantine  
160 Neolithic. We explored the placement of Moroccan and Southern Iberian Neolithic samples

161 in this context, and compared their genetic affinities to ancient and present-day West  
162 Eurasian and Levant populations in the Human Origins panel. Interestingly, PCA reveals that  
163 IAM individuals are different from any aDNA sample studied to date (Figure 2;  
164 Supplementary Note 6). When projected, IAM samples are close to modern North Africans,  
165 in the Levantine corner of the PCA space (Figure 2). Southern Iberian Neolithic individuals  
166 from TOR cluster with Sardinians and with other Anatolian and European Neolithic samples.  
167 Moreover, KEB samples are placed halfway between the IAM and Anatolian/European  
168 farmer clusters, in close proximity to Levant aDNA samples and also to Guanche samples<sup>16</sup>,  
169 the indigenous population of the Canary Islands known to have a Berber origin<sup>22</sup>. When  
170 compared using ADMIXTURE (See Supplementary Note 7 for details), IAM samples  
171 possess ~100% of a component partially shared by aDNA samples from the Middle East and  
172 Levant at low K values. At K=6, this IAM-like component is observed mainly in modern  
173 North Africa, following a west-to-east cline, and in the Guanches. TOR and other Early  
174 Neolithic samples from Iberia cluster together with farmers from Anatolia, the Aegean area  
175 and Europe. At K=8, the Early Neolithic individuals from Iberia differentiate from the  
176 Anatolian, Aegean and European Early Neolithic samples, and share their main component  
177 (purple) with Middle Neolithic/Chalcolithic samples (Figure 2). Finally, at low K values, KEB  
178 can be explained as having both IAM-like and European Neolithic components, suggesting  
179 an admixture process between IAM-like people and early farmers. Nevertheless, at K=8, the  
180 European component in KEB is predominantly “purple,” with some “green” component.  
181 This “green” component is also present, at a low frequency, in Natufians and other ancient  
182 Levantine populations. The substantially larger contribution of the “purple” component,  
183 when compared with the “green”, suggests a significant genetic contribution of ancient  
184 Iberians in Morocco (Figure 2). The same admixture profile is observed in Guanches, but the  
185 amount of IAM ancestry is consistently higher in all the samples. Given that the Guanches  
186 could have had originated in a different area of the Maghreb, this result might suggest that  
187 the European Neolithic impact in North Africa was heterogeneous.

188 [Figure 2 here]



189 To compare our samples directly to the genomes of ancient and modern populations, we  
190 calculated pair-wise  $F_{ST}$  distances, which, unlike PCA and global ancestry analyses, are  
191 insensitive to the inclusion of large numbers of individuals from modern populations.  $F_{ST}$   
192 values indicate that the IAM samples are as differentiated from all other populations as  
193 Yoruba are from non-Africans (Supplementary Note 9), with the sole exception of KEB and,  
194 to a lesser extent, the Guanches and modern North African populations. Given the relatively  
195 low heterozygosity and high identity-by-descent proportions observed in IAM  
196 (Supplementary Note 8), this differentiation could be driven by isolation and genetic drift.  
197 IAM is divergent from the other populations, with the exception of populations that likely  
198 received genetic influx from them. This raises the possibility that IAM was isolated in North  
199 Africa since Palaeolithic times, when a back migration from Eurasia brought mtDNA  
200 haplogroups M1 and U6 to the Maghreb<sup>18</sup>. Although IAM is clearly more similar to KEB  
201 than to any other population, the converse is not true. KEB has lower  $F_{ST}$  distances with any  
202 Anatolian, European (excluding European hunter gatherers), Levantine and Iranian  
203 population, rather than with IAM. In the modern DNA reference panel, KEB is similar to  
204 North African, European and Middle Eastern populations. Among the ancient populations,  
205 TOR is more similar to Middle Neolithic/Chalcolithic Europeans, and, among modern  
206 populations, to populations from Spain, North Italy and Sardinia.

207 To further investigate the genetic affinities of IAM, KEB and TOR samples, we conducted  
208 outgroup  $f_3$ -statistic analysis<sup>23</sup>. Results indicate that, when KEB and Guanches are excluded,  
209 IAM shares more drift with ancient Levantine populations, such as Natufians (Epipaleolithic)  
210 and Pre-Pottery Neolithic individuals (Figure 3; Supplementary Note 10), than with any  
211 other ancient population. To explore further the connection between IAM and Levantine  
212 populations, we performed an  $f_4$ -statistic analysis to test whether IAM shares more alleles  
213 with any other population in the Human Origins panel<sup>2,24</sup> than with ancient populations from  
214 the Levant (Supplementary Note 10). Consistently, and also with the exception of KEB and  
215 Guanches, all comparisons indicated higher similarity with Natufians and Levantine farmers.  
216 This suggests that most of IAM ancestry originates from an out-of-Africa source, as IAM  
217 shares more alleles with Levantines than with any sub-Saharan Africans, including the

218 4,500-year-old genome from Ethiopia<sup>14</sup>. To further test the hypothesis that IAM is more  
219 closely related to out-of-Africa populations, we determined if we could detect Neanderthal  
220 ancestry in IAM, which is typical of non-African populations. A signal of Neanderthal  
221 ancestry has been detected in modern North African populations<sup>25</sup>. A lack of Neanderthal  
222 ancestry in IAM would imply that the signal observed today is a product of more recent  
223 migration into North Africa from the Middle East and Europe in historical times. When  
224 compared to the Neanderthal high coverage genome sequence from Altai<sup>26</sup> and the low-  
225 coverage sequence from Vindija Cave<sup>27</sup>, and using the S-statistic<sup>23</sup>, we detected a  
226 Neanderthal introgression signal into IAM, suggesting derivation from the same event shared  
227 by non-African populations. All these results together indicate that the origin of IAM was  
228 outside Africa, most probably from the Levant. However, it is important to take into account  
229 that the number of ancient genomes for comparison is low and future sampling can provide  
230 further refinement in the origin of IAM.

231 Both  $F_{ST}$  and outgroup- $f_3$  statistic analyses indicate that KEB shares ancestry with IAM, but  
232 also more genetic drift with Neolithic and Chalcolithic populations from Anatolia and  
233 Europe, with the highest shared genetic drift appearing in Iberian Early Neolithic samples  
234 (Figure 3; Supplementary Note 10). This pattern and the result from ADMIXTURE could be  
235 explained if the KEB population was a mixture between IAM-related and European  
236 Neolithic groups. To formally test this hypothesis, we used an admixture- $f_3$  test<sup>23</sup>, using  
237 KEB as the test population, IAM as a reference population and one of the Anatolian and  
238 European Neolithic and Chalcolithic populations as the second reference population. All  
239 comparisons produced negative values of the  $f_3$ -statistic, which suggests the KEB population  
240 can be modelled as a mixture of IAM and Anatolian/European Neolithic.

241 TOR has more shared ancestry with Iberian Early Neolithic samples and other Neolithic and  
242 Chalcolithic populations from Europe. Archaeological studies have suggested that there was  
243 an Andalusian Early Neolithic culture with North African influences before the Cardial  
244 expansion into the Western Mediterranean basin<sup>28</sup>. However, we observe that TOR samples

245 have a similar genetic composition to that of Cardial individuals from Iberia, evidencing a  
246 common origin, and ruling out an Andalusian Early Neolithic distinct from Cardial Culture.

247 [Figure 3 here]

248 Finally, although limited by low coverage, phenotypic predictions based on genetic variants  
249 of known effects agree with our estimates of global ancestry. IAM people do not possess any  
250 of the European SNPs associated with light pigmentation, and most likely had dark skin and  
251 eyes. IAM samples present ancestral alleles for pigmentation-associated variants present in  
252 SLC24A5 (rs1426654), SLC45A2 (rs16891982) and OCA2 (rs1800401 and 12913832)  
253 genes. On the other hand, KEB individuals exhibit some European- derived alleles that  
254 predispose individuals to lighter skin and eye colour, including those on genes SLC24A5  
255 (rs1426654) and OCA2 (rs1800401) (Supplementary Note 11).

## 256 **CONCLUSION**

257 Genetic analyses have revealed that the population history of modern North Africans is quite  
258 complex<sup>11</sup>. Based on our aDNA analysis, we identify an Early Neolithic Moroccan  
259 component that is restricted to North Africa in present-day populations<sup>11</sup>, and that is the sole  
260 ancestry in IAM samples. We hypothesize that this component represents the autochthonous  
261 Maghrebi ancestry associated with Berber populations. This Maghrebi component is  
262 different from those of any ancient samples studied so far and is distantly related to that of  
263 Epipaleolithic people from the Levant. Our data suggests that the IAM population was  
264 isolated in the Maghreb since the Upper Palaeolithic back migration, although it is  
265 impossible to be certain without paleogenomic data from North African Palaeolithic samples.  
266 An expansion in Early Neolithic times followed by strong genetic drift might also be  
267 plausible.

268 Our hypothesis is in agreement with archaeological research pointing to the first stage of the  
269 Neolithic expansion in Morocco as the result of a local population who adopted some  
270 technological innovations, such as pottery production or farming, from neighbouring areas.

271 By 3,000 BCE, a continuity in the Neolithic spread brought Mediterranean-like ancestry to  
272 the Maghreb, most likely from Iberia. Other archaeological remains, such as African  
273 elephant ivory and ostrich eggs found in Iberian sites, confirm the existence of contacts and  
274 exchange networks through both sides of the Gibraltar strait at this time. Our analyses  
275 strongly support that at least some of the European ancestry observed today in North Africa  
276 is related to prehistoric migrations, and local Berber populations were already admixed with  
277 Europeans before the Roman conquest. Furthermore, additional European/Iberian ancestry  
278 could have reached the Maghreb after KEB people; this scenario is supported by the  
279 presence of Iberian-like Bell-Beaker pottery in more recent stratigraphic layers of IAM and  
280 KEB caves. Future palaeogenomic efforts in North Africa will further disentangle the  
281 complex history of migrations that forged the ancestry of the admixed populations we  
282 observe today.

## 283 **MATERIAL AND METHODS**

284 Measures to avoid and monitor contamination from modern DNA were applied, at all times,  
285 during sample manipulation. Ancient DNA was extracted from teeth or bone, built into  
286 double-stranded indexed libraries and sequenced on an Illumina NextSeq 500  
287 (Supplementary Note 2). Due to the environmental conditions of the burial sites, we  
288 expected to recover low proportions of endogenous DNA from these ancient remains. To  
289 overcome limitations due to DNA degradation, we applied two different capture methods to  
290 enrich for human reads (Supplementary Note 2): one targeting the whole genome<sup>29</sup> and one  
291 targeting the variants of the MEGA array (Illumina Inc.).

292 Reads were trimmed and adapters removed using AdapterRemoval<sup>30</sup>, and then mapped to the  
293 human reference genome (hg19) using BWA<sup>31</sup>. Low quality (MAPQ<30) and duplicate reads  
294 were removed using SAMtools<sup>32</sup>. MapDamage<sup>33</sup> was used to visualize misincorporation and  
295 fragmentation patterns, and to rescale the quality of bases likely affected by post-mortem  
296 damage. Confidence intervals of sex determination were calculated following Skoglund et  
297 al.<sup>34</sup>. MtDNA haplogroups were determined using HaploGrep<sup>35</sup>. Y-chromosome haplogroup  
298 inference was carried out as in Schroeder et al.<sup>36</sup>. As the reference panel, we used both the

299 Human Origins panel<sup>2</sup> and the HGDP dataset genotyped with MEGA-ex (Illumina Inc.). For  
300 principal component analysis, we projected the aDNA samples on the PCA space built with  
301 the modern dataset, using smartpca<sup>37</sup> and LASER<sup>38</sup>. Admixture estimations were done using  
302 ADMIXTURE software<sup>21</sup>.  $F_{ST}$  distances were calculated using smartpca<sup>37</sup>. Identity-by-  
303 descent proportions were estimated using PLINK<sup>39</sup>, and heterozygosity estimations using a  
304 newly developed method for low-coverage genomes (Supplementary Note 8). f-statistics  
305 estimates were calculated using admixtools software<sup>23</sup>. All plots were prepared using R  
306 software<sup>40</sup>. Detailed information about methods is included in the Supplementary Notes.

307

308 **Acknowledgements** C.D.B and R.F. were funded by a grant from the National Science Foundation (1201234).  
309 R.F. was funded by Fundación Canaria Dr. Manuel Morales fellowship. A.E.R.S. was funded by Ciencia sem  
310 Fronteiras fellowship - CAPES, Brazil. B.S. and J.K. were funded by a grant from the Gordon and Betty Moore  
311 Foundation (GBMF-3804).

312 **Author Contributions** R.F. and C.D.B conceived the idea for the study, D.M.S, M.D.C.M, J.S., J.M, Y.B.,  
313 F.J.R.S, A.M. and A.T.M assembled skeletal material and provided archaeological background for the samples,  
314 R.F., A.E.R.S., J.K. and A.S. performed work in the wet laboratory, F.M. developed methods for data analysis,  
315 M.R. developed methods for DNA capture, R.F., F.M., M.A.A, P.A.U, G.W., analysed data, C.D.B and B.S.  
316 supervised the study, R.F., F.M. and C.D.B. wrote the manuscript and supplements with input from all co-  
317 authors.

318 **Author Information** Sequence data are available through the European Nucleotide Archive (PRJEB22699).  
319 Consensus mtDNA sequences are available at the National Center of Biotechnology Information (Accession  
320 Numbers MF991431-MF991448). The authors declare no competing financial interests. Correspondence and  
321 requests for materials should be addressed to R.F. (e-mail: rfregel@stanford.edu).

322 **REFERENCES**

- 323 1 Nielsen, R. *et al.* Tracing the peopling of the world through genomics. *Nature* **541**,  
324 302-310, doi:10.1038/nature21347 (2017).
- 325 2 Lazaridis, I. *et al.* Genomic insights into the origin of farming in the ancient Near  
326 East. *Nature* **536**, 419-424, doi:10.1038/nature19310 (2016).
- 327 3 Linstädter, J., Medved, I., Solich, M. & Weniger, G. C. Neolithisation process within  
328 the Alboran territory: Models and possible African impact. *Quaternary International*  
329 **274**, 219 - 232, doi:10.1016/j.quaint.2012.01.013 (2012).
- 330 4 Zilhão, J. Early prehistoric navigation in the Western Mediterranean: Implications for  
331 the Neolithic transition in Iberia and the Maghreb. *Eurasian Prehistory*, 185-200  
332 (2014).
- 333 5 Martínez-Sánchez, R. M., Vera-Rodríguez, J. C., Pérez-Jordà, G., Peña-Chocarro, L.  
334 & Bokbot, Y. The beginning of the Neolithic in northwestern Morocco. *Quaternary*  
335 *International* **In press** (2017).
- 336 6 Mulazzani, S. *et al.* The emergence of the Neolithic in North Africa: A new model  
337 for the Eastern Maghreb. *Quaternary International* **410**, 123 - 143,  
338 doi:10.1016/j.quaint.2015.11.089 (2016).
- 339 7 Barton, N. *et al.* Human Burial Evidence from Hattab II Cave and the Question of  
340 Continuity in Late Pleistocene–Holocene Mortuary Practices in Northwest Africa.  
341 *Cambridge Archaeological Journal* **18**, 195–214, doi:10.1017/S0959774308000255  
342 (2008).
- 343 8 Lubell, D., Sheppard, P. & Jackes, M. in *Advances in World Archaeology* (eds F.  
344 Wendorf & A. Close) 146-191 (Academic Press, 1984).
- 345 9 Linstädter, J. Epipalaeolithic-Neolithic-Transition in the Mediterranean region of  
346 Northwest-Africa. *Quartär* **55**, 41-62 (2008).
- 347 10 de Groote, I. & Humphrey, L. T. Characterizing evulsion in the Later Stone Age  
348 Maghreb: Age, sex and effects on mastication. *Quaternary International* **413**, 50 - 61,  
349 doi:<https://doi.org/10.1016/j.quaint.2015.08.082> (2016).

- 350 11 Henn, B. M. *et al.* Genomic Ancestry of North Africans Supports Back-to-Africa  
351 Migrations. *Plos Genetics* **8**, e1002397-e1002397, doi:10.1371/journal.pgen.1002397  
352 (2012).
- 353 12 Arauna, L. R. *et al.* Recent Historical Migrations Have Shaped the Gene Pool of  
354 Arabs and Berbers in North Africa. *Mol Biol Evol* **34**, 318-329,  
355 doi:10.1093/molbev/msw218 (2017).
- 356 13 Fadhlaoui-Zid, K. *et al.* Genome-wide and paternal diversity reveal a recent origin of  
357 human populations in North Africa. *PLoS One* **8**, e80293,  
358 doi:10.1371/journal.pone.0080293 (2013).
- 359 14 Gallego Llorente, M. *et al.* Ancient Ethiopian genome reveals extensive Eurasian  
360 admixture throughout the African continent. *Science* **350**, 820-822,  
361 doi:10.1126/science.aad2879 (2015).
- 362 15 Schuenemann, V. J. *et al.* Ancient Egyptian mummy genomes suggest an increase of  
363 Sub-Saharan African ancestry in post-Roman periods. *Nat Commun* **8**, 15694,  
364 doi:10.1038/ncomms15694 (2017).
- 365 16 Rodriguez-Varela, R. *et al.* Genomic Analyses of Pre-European Conquest Human  
366 Remains from the Canary Islands Reveal Close Affinity to Modern North Africans.  
367 *Curr Biol* **27**, 3396-3402 e3395, doi:10.1016/j.cub.2017.09.059 (2017).
- 368 17 Garcia-Borja, P., Aura-Tortosa, J. E., Bernabeu-Auban, J. & Jorda-Pardo, J. F.  
369 Nuevas perspectivas sobre la neolitizacion en la cueva de Nerja (Malaga-Espana): La  
370 ceramica de la sala del vestibulo. *Zephyrus* **LXVI**, 109-132 (2010).
- 371 18 Pennarun, E. *et al.* Divorcing the Late Upper Palaeolithic demographic histories of  
372 mtDNA haplogroups M1 and U6 in Africa. *BMC Evol Biol* **12**, 234,  
373 doi:10.1186/1471-2148-12-234.; eng; ID: 4230 (2012).
- 374 19 Secher, B. *et al.* The history of the North African mitochondrial DNA haplogroup U6  
375 gene flow into the African, Eurasian and American continents. *BMC evolutionary*  
376 *biology* **14**, 109, doi:1471-2148-14-109 [pii] (2014).
- 377 20 Haak, W. *et al.* Ancient DNA from European early neolithic farmers reveals their  
378 near eastern affinities. *PLoS Biol* **8**, e1000536 (2010).

- 379 21 Alexander, D. H., Novembre, J. & Lange, K. Fast model-based estimation of ancestry  
380 in unrelated individuals. *Genome research* **19**, 1655-1664,  
381 doi:10.1101/gr.094052.109 [doi] (2009).
- 382 22 Maca-Meyer, N. *et al.* Ancient mtDNA analysis and the origin of the Guanches. *Eur*  
383 *J Hum Genet* **12**, 155-162 (2004).
- 384 23 Patterson, N. *et al.* Ancient Admixture in Human History. *Genetics* **192**, 1065-+,  
385 doi:10.1534/genetics.112.145037 (2012).
- 386 24 Lazaridis, I. *et al.* Ancient human genomes suggest three ancestral populations for  
387 present-day Europeans. *Nature* **513**, 409-413, doi:10.1038/nature13673 (2014).
- 388 25 Sanchez-Quinto, F. *et al.* North African populations carry the signature of admixture  
389 with Neandertals. *PLoS One* **7**, e47765, doi:10.1371/journal.pone.0047765 (2012).
- 390 26 Prufer, K. *et al.* The complete genome sequence of a Neanderthal from the Altai  
391 Mountains. *Nature* **505**, 43-49, doi:10.1038/nature12886 [doi] (2014).
- 392 27 Green, R. E. *et al.* A draft sequence of the Neandertal genome. *Science* **328**, 710-722  
393 (2010).
- 394 28 Cortes Sanchez, M. *et al.* The Mesolithic-Neolithic transition in southern Iberia.  
395 *Quaternary Research* **77**, 221-234 (2012).
- 396 29 Carpenter, M. L. *et al.* Pulling out the 1%: Whole-Genome Capture for the Targeted  
397 Enrichment of Ancient DNA Sequencing Libraries. *American Journal of Human*  
398 *Genetics* **93**, 852-864, doi:10.1016/j.ajhg.2013.10.002 (2013).
- 399 30 Lindgreen, S. AdapterRemoval: easy cleaning of next-generation sequencing reads.  
400 *BMC research notes* **5**, 337, doi:10.1186/1756-0500-5-337 (2012).
- 401 31 Li, H. & Durbin, R. Fast and accurate short read alignment with Burrows-Wheeler  
402 transform. *Bioinformatics* **25**, 1754-1760, doi:10.1093/bioinformatics/btp324 (2009).
- 403 32 Li, H. *et al.* The Sequence Alignment/Map format and SAMtools. *Bioinformatics* **25**,  
404 2078-2079, doi:10.1093/bioinformatics/btp352 (2009).
- 405 33 Ginolhac, A., Rasmussen, M., Gilbert, M. T., Willerslev, E. & Orlando, L.  
406 mapDamage: testing for damage patterns in ancient DNA sequences. *Bioinformatics*  
407 **27**, 2153-2155, doi:10.1093/bioinformatics/btr347 (2011).



- 408 34 Skoglund, P., Stora, J., Gotherstrom, A. & Jakobsson, M. Accurate sex identification  
409 of ancient human remains using DNA shotgun sequencing. *Journal of*  
410 *Archaeological Science* **40**, 4477-4482 (2013).
- 411 35 Kloss-Brandstatter, A. *et al.* HaploGrep: a fast and reliable algorithm for automatic  
412 classification of mitochondrial DNA haplogroups. *Hum Mutat* **32**, 25-32,  
413 doi:10.1002/humu.21382 (2011).
- 414 36 Schroeder, H. *et al.* Genome-wide ancestry of 17th-century enslaved Africans from  
415 the Caribbean. *Proc Natl Acad Sci U S A* **112**, 3669-3673,  
416 doi:10.1073/pnas.1421784112 (2015).
- 417 37 Price, A. L. *et al.* Principal components analysis corrects for stratification in genome-  
418 wide association studies. *Nat Genet* **38**, 904-909, doi:10.1038/ng1847 (2006).
- 419 38 Wang, C. *et al.* Ancestry estimation and control of population stratification for  
420 sequence-based association studies. *Nat Genet* **46**, 409-415, doi:10.1038/ng.2924  
421 (2014).
- 422 39 Purcell, S. *et al.* PLINK: A tool set for whole-genome association and population-  
423 based linkage analyses. *American Journal of Human Genetics* **81**, 559-575,  
424 doi:10.1086/519795 (2007).
- 425 40 A language and environment for statistical computing (R Foundation for Statistical  
426 Computing. Vienna, Austria. ISBN 3-900051-07-0, URL <http://www.R-project.org>,  
427 2008).
- 428

432 **FIGURES**

433 Figure 1. Geographical location (A) and calibrated radiocarbon date (B) of the  
 434 samples included in this study, as well as other ancient DNA samples from the  
 435 literature.

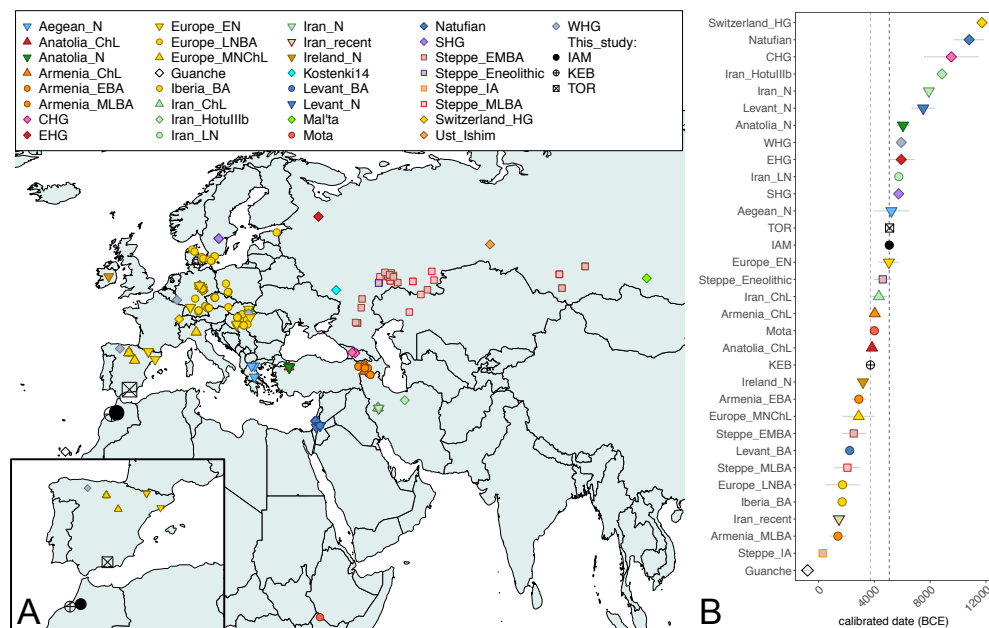

436

437

438 Figure 2. Ancestry inference in ancient samples from North Africa and the Iberian  
 439 Peninsula. (A) PCA analysis using the Human Origins panel, (B) ADMIXTURE  
 440 analysis using the HGDP-MEGA dataset (K=5), (C) ADMIXTURE analysis using  
 441 the Human Origins dataset for modern and ancient populations (K=8), and (D)  
 442 detailed ADMIXTURE analysis for European Neolithic samples (K=8).

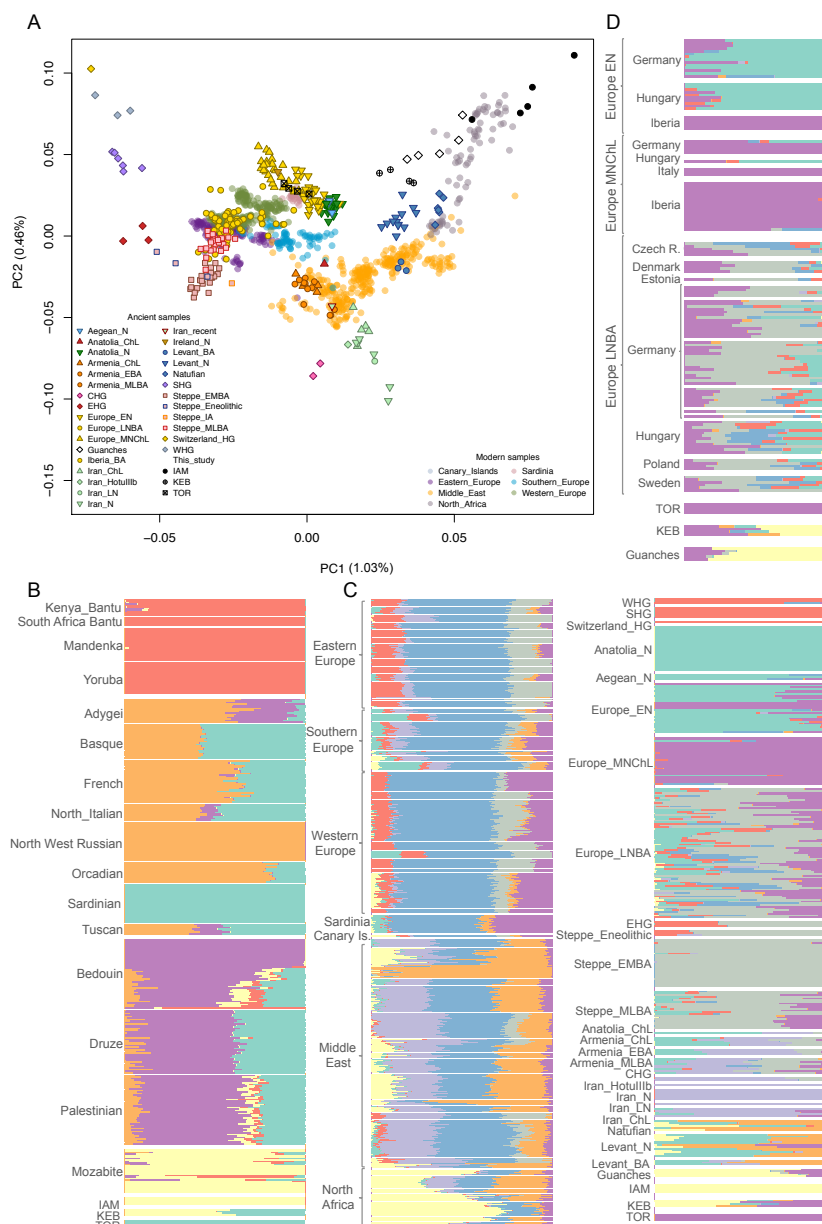

443

444

445 Figure 3. Outgroup f3-statistic for IAM (A), KEB (B) and TOR (C), and admixture  
 446 f3-statistic for KEB (D).

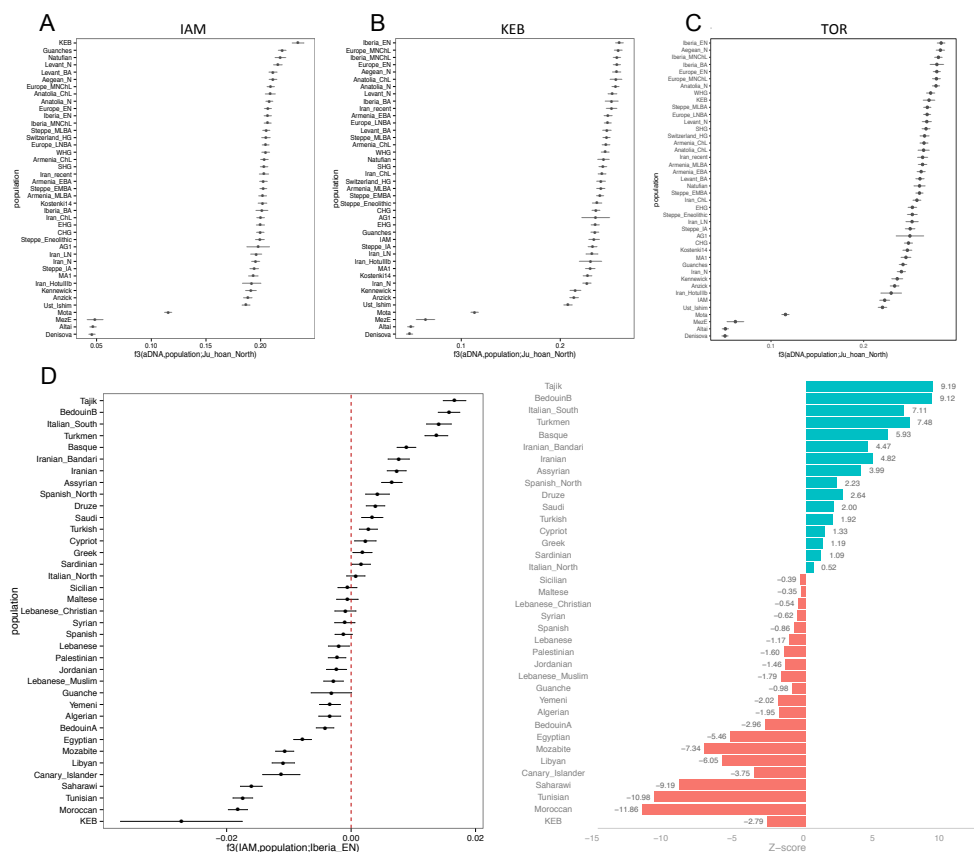

448 Table 1 - Summary statistics for North African and Iberian samples.

| Sample | Origin               | 2 sigma calibrated radiocarbon date (BCE) | MDNA coverage | MDNA haplogroup | Contamination estimation | Molecular sex | Y-chromosome haplogroup | SNPs in MEGA dataset | SNPs in Human Origins dataset | MEGA coverage | Genome-wide coverage |
|--------|----------------------|-------------------------------------------|---------------|-----------------|--------------------------|---------------|-------------------------|----------------------|-------------------------------|---------------|----------------------|
| IAM3   | Ifri n'Amr or Moussa | 5325 - 5210                               | 5X            | M1b1            | 6.42% (21.49% - 1.90%)   | XX            | -                       | 26,798               | 5,353                         | 0.04X         | 0.01X                |
| IAM4   | Ifri n'Amr or Moussa | 5215 - 5005                               | 52X           | U6a1b           | 4.66% (6.64% - 3.26%)    | XY            | E-L19*                  | 62,729               | 17,093                        | 0.12X         | 0.02X                |
| IAM5   | Ifri n'Amr or Moussa | 5199 - 5176<br>5066 - 4942                | 82X           | U6a1b           | 3.68% (5.26% - 2.62%)    | XY            | E-L19*                  | 408,744              | 208,661                       | 1.72X         | 0.74X                |
| IAM6   | Ifri n'Amr or Moussa | 5290 - 5265<br>5230 - 5195<br>5180 - 5060 | 21X           | U6a7b2          | 5.28% (8.48% - 3.02%)    | XX            | -                       | 90,226               | 18,285                        | 0.17X         | 0.02X                |
| IAM7   | Ifri n'Amr or Moussa | 5000 - 4840                               | 129X          | U6a3            | 2.35% (3.39% - 1.67%)    | XY            | -                       | 177,041              | 45,134                        | 0.38X         | 0.06X                |
| KEB1   | Keif' el Boroud      |                                           | 18X           | X2b             | 3.03% (6.31% - 1.23%)    | XX            | -                       | 96,946               | 39,312                        | 0.16X         | 0.08X                |
| KEB3   | Keif' el Boroud      |                                           | 20X           | K1a1b1          | 3.16% (5.73% - 1.72%)    | -             | -                       | -                    | -                             | -             | -                    |
| KEB4   | Keif' el Boroud      |                                           | 135X          | K1a1b1          | 2.49% (3.27% - 1.89%)    | XX            | -                       | 304,607              | 77,964                        | 0.64X         | 0.12X                |
| KEB6   | Keif' el Boroud      | 3780 - 3650                               | 14X           | K1a4a1          | 3.77% (6.72% - 1.98%)    | XY            | T-M184                  | 95,152               | 52,694                        | 0.16X         | 0.14X                |
| KEB7   | Keif' el Boroud      |                                           | 12X           | T2b3            | 1.44% (4.31% - 0.31%)    | XY            | -                       | -                    | -                             | -             | -                    |
| KEB8   | Keif' el Boroud      |                                           | 23X           | X2b             | 3.03% (6.23% - 1.27%)    | XX            | -                       | 34,385               | 18,974                        | 0.06X         | 0.05X                |
| TOR1   | El Toro              | 5280 - 4780                               | 170X          | T2c1d           | 1.42% (2.07% - 0.98%)    | -             | -                       | -                    | -                             | -             | -                    |
| TOR5   | El Toro              | 5040 - 4850                               | 18X           | J2b1a           | 4.47% (8.76% - 1.96%)    | XY            | G-M201                  | -                    | -                             | -             | -                    |
| TOR6   | El Toro              |                                           | 53X           | T2b3            | 4.15% (5.89% - 2.94%)    | XX            | -                       | 318,110              | 101,698                       | 0.67X         | 0.17X                |
| TOR7   | El Toro              |                                           | 126X          | T2b3            | 7.06% (8.36% - 5.88%)    | XX            | -                       | 115,652              | 24,719                        | 0.18X         | 0.03X                |
| TOR8   | El Toro              | 5280 - 4780                               | 234X          | K1a1            | 3.95% (4.80% - 3.26%)    | XX            | -                       | 212,370              | 46,364                        | 0.38X         | 0.06X                |
| TOR11  | El Toro              |                                           | 124X          | K1a2a           | 3.88% (5.00% - 2.98%)    | XX            | -                       | 80,687               | 17,306                        | 0.15X         | 0.03X                |
| TOR12  | El Toro              |                                           | 174X          | J2b1a           | 1.50% (2.30% - 0.93%)    | XY            | -                       | -                    | -                             | -             | -                    |

449
